# Supplementary material for: Online Quantitative Monitoring of Microalgae Concentration Using a Coupled Neural Network with Self-Search and Group Convolution
Source: Research Square preprint supplement (doi:10.21203/rs.3.rs-6781945/v1), 2025-06-16
Supplement: Supplementary file 1 [file 069f845bfed820dea6b8b8c3.docx]

**Supplementary Material**

Supplementary information of microalgae cultivation suspensions images at different concentrations, program codes of proposed models in this work.

**Table S1.** Images of microalgae cultivation suspensions at different concentrations.

| DCW (g/L) | Image_1 | Image_2 | Image_3 | Image_4 |
| --- | --- | --- | --- | --- |
| 0.009 | 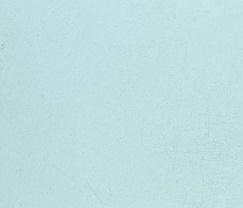 | 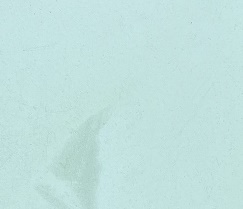 | 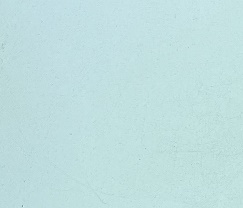 | 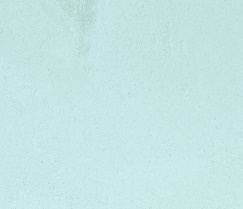 |
| 0.049 | 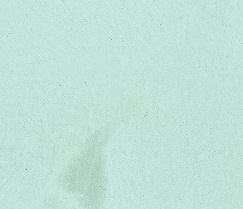 | 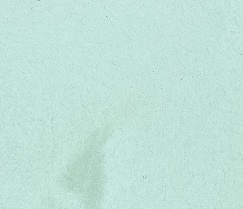 | 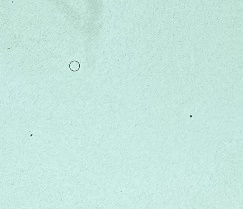 | 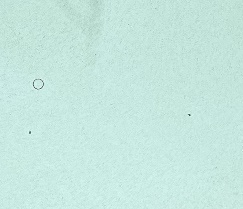 |
| 0.093 | 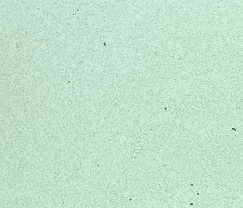 | 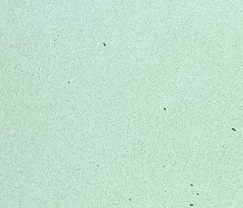 | 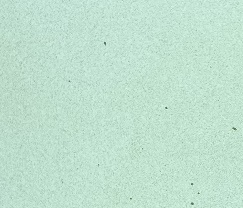 | 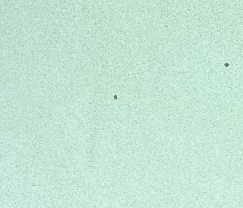 |
| 0.152 | 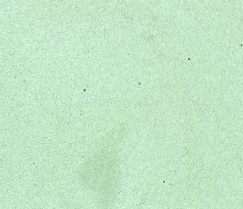 | 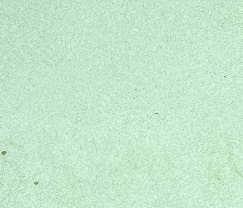 | 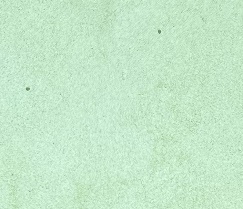 | 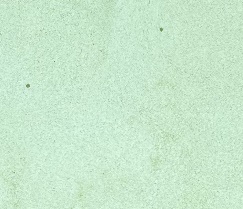 |
| 0.203 | 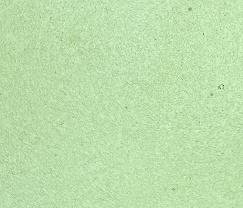 | 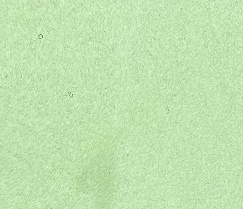 | 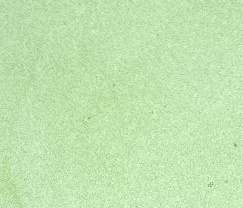 | 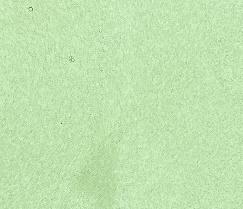 |
| 0.251 | 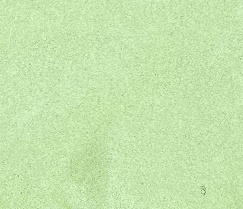 | 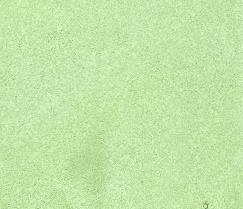 | 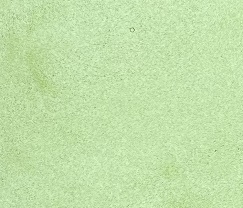 | 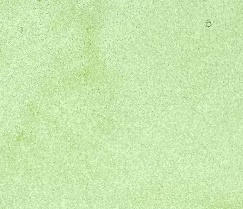 |
| 0.304 | 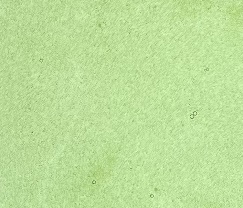 | 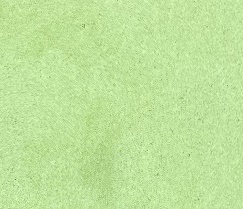 | 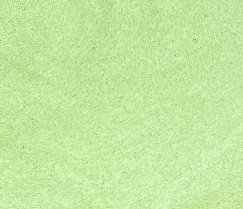 | 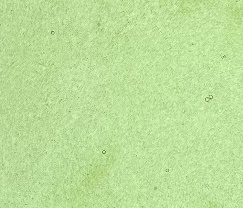 |
| 0.352 | 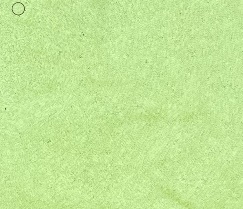 | 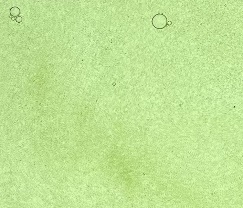 | 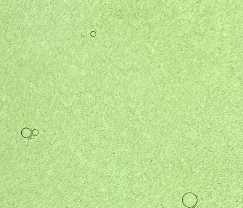 | 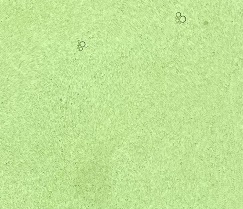 |
| 0.397 | 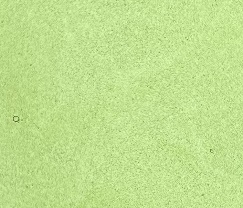 | 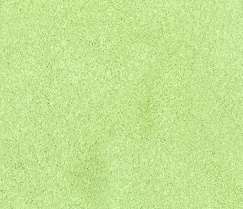 | 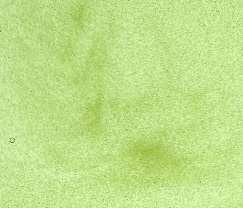 | 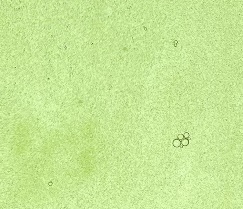 |
| 0.506 | 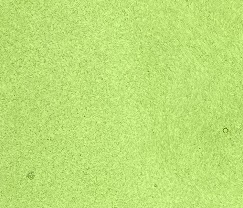 | 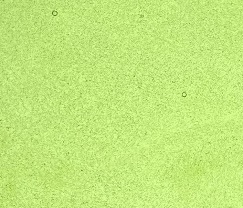 | 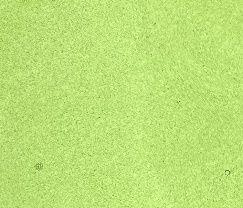 | 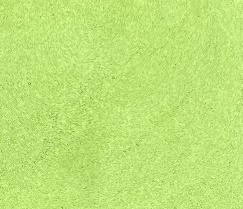 |
| 0.611 | 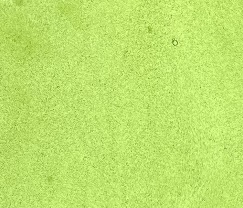 | 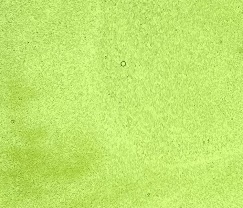 | 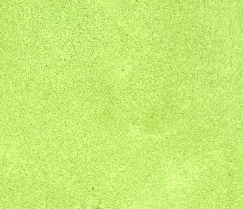 | 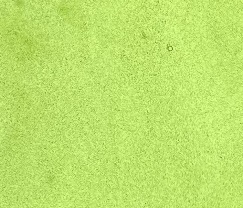 |
| 0.709 | 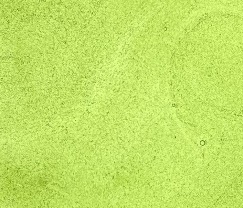 | 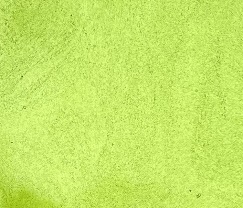 | 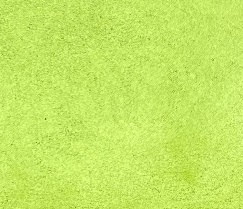 | 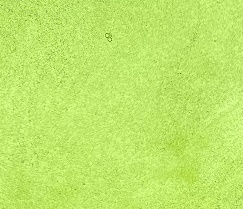 |
| 0.813 | 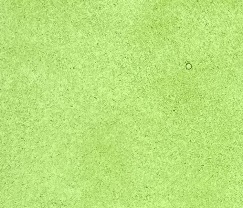 | 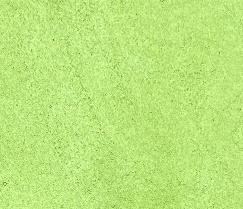 | 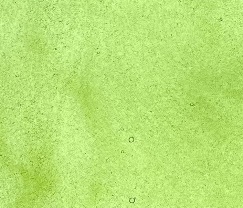 | 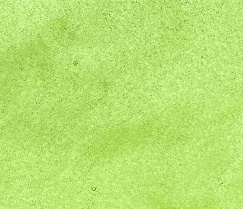 |
| 0.906 | 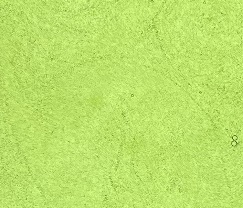 | 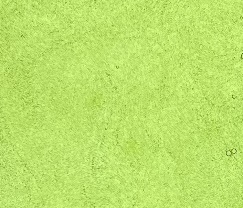 | 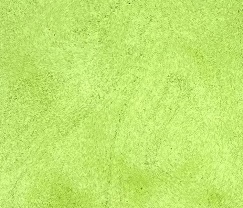 | 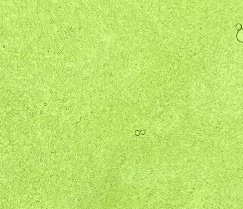 |
| 1.004 | 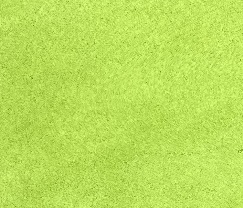 | 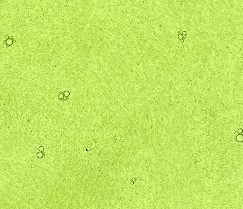 | 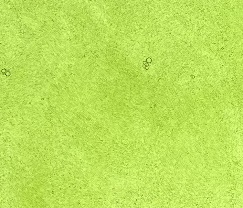 | 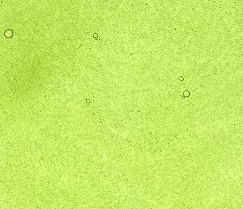 |
| 1.524 | 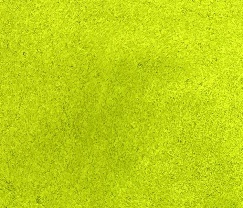 | 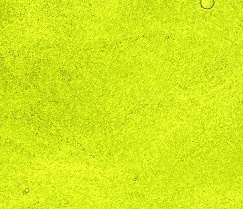 | 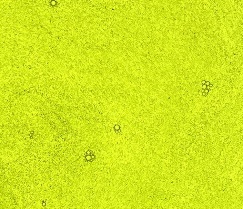 | 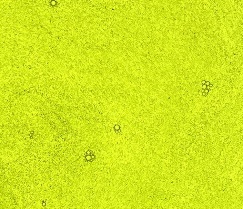 |
| 2.123 | 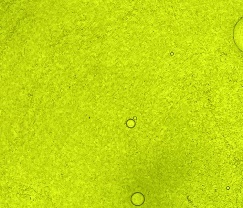 | 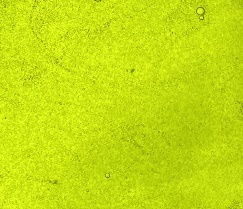 | 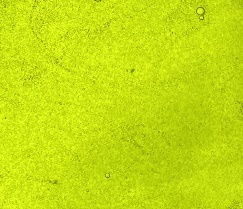 | 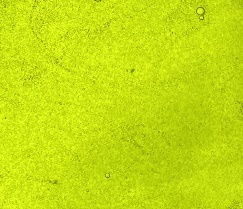 |
| 2.674 | 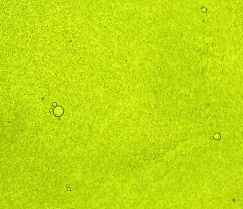 | 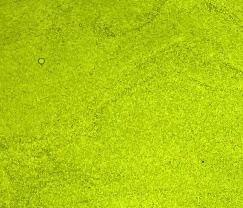 | 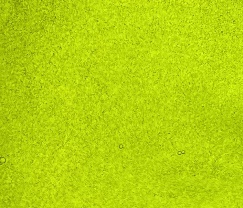 | 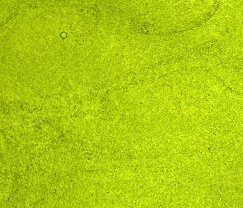 |
| 5.114 | 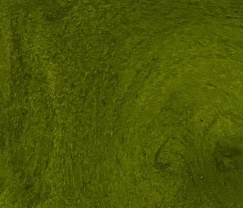 | 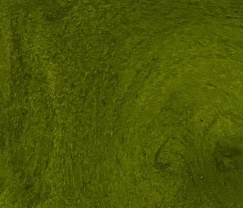 | 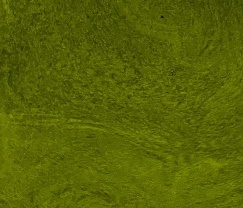 | 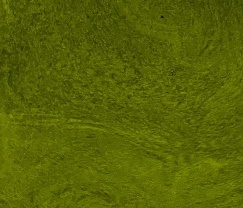 |
| 7.642 | 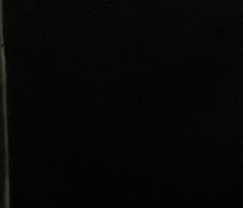 | 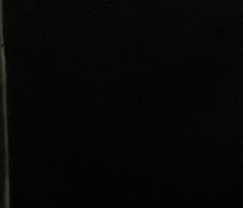 | 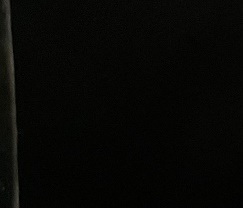 | 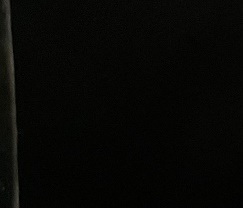 |

**Appendix S1. Program code for RES**

class BasicBlock(nn.Module):

expansion = 1

def __init__(self, in_planes, planes, stride=1, downsample=None):

super(BasicBlock, self).__init__()

self.conv1 = nn.Conv2d(in_planes, planes, kernel_size=3, stride=stride, padding=1, bias=False)

self.bn1 = nn.BatchNorm2d(planes)

self.conv2 = nn.Conv2d(planes, planes, kernel_size=3, stride=1, padding=1, bias=False)

self.bn2 = nn.BatchNorm2d(planes)

self.downsample = downsample

def forward(self, x):

identity = x

out = F.relu(self.bn1(self.conv1(x)))

out = self.bn2(self.conv2(out))

if this.downsample is not None:

identity = self.downsample(x)

out += identity

out = F.relu(out)

return out

class ResNet(nn.Module):

def __init__(self, block, layers, num_classes=1000):

super(ResNet, self).__init__()

self.in_planes = 64

self.conv1 = nn.Conv2d(3, 64, kernel_size=7, stride=2, padding=3, bias=False)

self.bn1 = nn.BatchNorm2d(64)

self.relu = nn.ReLU(inplace=True)

self.maxpool = nn.MaxPool2d(kernel_size=3, stride=2, padding=1)

self.layer1 = self._make_layer(block, 64, layers[0])

self.layer2 = self._make_layer(block, 128, layers[1], stride=2)

self.layer3 = self._make_layer(block, 256, layers[2], stride=2)

self.layer4 = self._make_layer(block, 512, layers[3], stride=2)

self.avgpool = nn.AdaptiveAvgPool2d((1, 1))

self.fc = nn.Linear(512 * block.expansion, num_classes)

def _make_layer(self, block, planes, blocks, stride=1):

downsample = None

if stride != 1 or self.in_planes != planes * block.expansion:

downsample = nn.Sequential(

nn.Conv2d(self.in_planes, planes * block.expansion, kernel_size=1, stride=stride, bias=False),

nn.BatchNorm2d(planes * block.expansion),

)

layers = []

layers.append(block(self.in_planes, planes, stride, downsample))

self.in_planes = planes * block.expansion

for _ in range(1, blocks):

layers.append(block(self.in_planes, planes))

return nn.Sequential(*layers)

def forward(self, x):

x = self.relu(self.bn1(self.conv1(x)))

x = self.maxpool(x)

x = self.layer1(x)

x = self.layer2(x)

x = self.layer3(x)

x = self.layer4(x)

x = self.avgpool(x)

x = torch.flatten(x, 1)

x = self.fc(x)

return x

def ResNet18(num_classes=1000):

return ResNet(BasicBlock, [2, 2, 2, 2], num_classes=num_classes)

**Appendix S2. Program code for RES-G**

class BasicBlock(nn.Module):

expansion = 1

def __init__(self, in_planes, planes, stride=1, downsample=None):

super(BasicBlock, self).__init__()

self.conv1 = nn.Conv2d(in_planes, planes, kernel_size=3, stride=stride, padding=1, bias=False)

self.bn1 = nn.BatchNorm2d(planes)

self.conv2 = nn.Conv2d(planes, planes, kernel_size=3, stride=1, padding=1, bias=False)

self.bn2 = nn.BatchNorm2d(planes)

self.downsample = downsample

def forward(self, x):

identity = x

out = F.relu(self.bn1(self.conv1(x)))

out = self.bn2(self.conv2(out))

if self.downsample is not None:

identity = self.downsample(x)

out += identity

out = F.relu(out)

return out

class ResNeXtBlock(nn.Module):

expansion = 1

def __init__(self, inplanes, planes, stride=1, downsample=None, groups=32):

super(ResNeXtBlock, self).__init__()

self.conv1 = nn.Conv2d(inplanes, planes * self.expansion, kernel_size=3, stride=stride, padding=1, bias=False, groups=groups)

self.conv2 = nn.Conv2d(planes * self.expansion, planes * self.expansion, kernel_size=3, stride=1, padding=1, bias=False, groups=groups)

self.bn1 = nn.BatchNorm2d(planes * self.expansion)

self.bn2 = nn.BatchNorm2d(planes * self.expansion)

self.relu = nn.ReLU(inplace=True)

self.downsample = downsample

self.stride = stride

def forward(self, x):

identity = x

out = self.conv1(x)

out = self.bn1(out)

out = self.relu(out)

out = self.conv2(out)

out = self.bn2(out)

if self.downsample is not None:

identity = self.downsample(x)

out += identity

out = self.relu(out)

return out

class ResNeXt18(nn.Module):

def __init__(self, block, layers, num_classes=1000, groups=32, width_per_group=64):

super(ResNeXt18, self).__init__()

self.inplanes = 64

self.groups = groups

self.base_width = width_per_group

self.conv1 = nn.Conv2d(3, self.inplanes, kernel_size=7, stride=2, padding=3, bias=False)

self.bn1 = nn.BatchNorm2d(self.inplanes)

self.relu = nn.ReLU(inplace=True)

self.maxpool = nn.MaxPool2d(kernel_size=3, stride=2, padding=1)

self.layer1 = self._make_layer(block, 64, layers[0])

self.layer2 = self._make_layer(block, 128, layers[1], stride=2)

self.layer3 = self._make_layer(block, 256, layers[2], stride=2)

self.layer4 = self._make_layer(block, 512, layers[3], stride=2)

self.avgpool = nn.AdaptiveAvgPool2d((1, 1))

self.fc = nn.Linear(512 * block.expansion, num_classes)

def _make_layer(self, block, planes, blocks, stride=1):

downsample = None

if stride != 1 or self.inplanes != planes * block.expansion:

downsample = nn.Sequential(

nn.Conv2d(self.inplanes, planes * block.expansion, kernel_size=1, stride=stride, bias=False),

nn.BatchNorm2d(planes * block.expansion),

)

layers = []

for _ in range(blocks):

layers.append(block(self.inplanes, planes, stride, downsample, self.groups))

self.inplanes = planes * block.expansion

stride = 1

downsample = None

return nn.Sequential(*layers)

def forward(self, x):

x = self.conv1(x)

x = self.bn1(x)

x = self.relu(x)

x = self.maxpool(x)

x = self.layer1(x)

x = self.layer2(x)

x = self.layer3(x)

x = self.layer4(x)

x = self.avgpool(x)

x = torch.flatten(x, 1)

x = self.fc(x)

return x

def resnext18(num_classes=1000, groups=32, width_per_group=64):

model = ResNeXt18(ResNeXtBlock, [2, 2, 2, 2], num_classes=num_classes, groups=groups, width_per_group=width_per_group)

return model

**Appendix S3. Program code for RES-SG**

class SeparableConv2d(nn.Module):

def __init__(self, in_channels, out_channels, kernel_size, stride, padding):

super(SeparableConv2d, self).__init__()

self.depthwise = nn.Conv2d(in_channels, in_channels, kernel_size=kernel_size,

stride=stride, padding=padding, groups=in_channels, bias=False)

self.pointwise = nn.Conv2d(in_channels, out_channels, kernel_size=1, bias=False)

def forward(self, x):

x = self.depthwise(x)

x = self.pointwise(x)

return x

class NASNetCell(nn.Module):

def __init__(self, in_channels, out_channels, repeat):

super(NASNetCell, self).__init__()

self.repeat = repeat

self.layers = nn.ModuleList()

for _ in range(self.repeat):

self.layers.append(nn.Sequential(

nn.ReLU(),

SeparableConv2d(in_channels, out_channels, kernel_size=5, stride=1, padding=2),

nn.BatchNorm2d(out_channels),

nn.ReLU(),

SeparableConv2d(out_channels, out_channels, kernel_size=3, stride=1, padding=1),

nn.BatchNorm2d(out_channels)

))

def forward(self, x):

for layer in self.layers:

x = layer(x)

return x

class NASNetLarge(nn.Module):

def __init__(self, num_classes=1000):

super(NASNetLarge, self).__init__()

self.conv0 = nn.Conv2d(3, 96, kernel_size=3, stride=2, padding=0, bias=False)

self.bn0 = nn.BatchNorm2d(96)

self.cell_stem_0 = NASNetCell(96, 168, 5)

self.reduction_cell_0 = NASNetCell(168, 336, 5)

self.cell_stem_1 = NASNetCell(336, 672, 5)

self.reduction_cell_1 = NASNetCell(672, 1344, 5)

self.cell_0 = NASNetCell(1344, 1344, 6)

self.avg_pool = nn.AdaptiveAvgPool2d(1)

self.dropout = nn.Dropout(0.5)

self.fc = nn.Linear(1344, num_classes)

def forward(self, x):

x = self.conv0(x)

x = self.bn0(x)

x = self.cell_stem_0(x)

x = self.reduction_cell_0(x)

x = self.cell_stem_1(x)

x = self.reduction_cell_1(x)

x = self.cell_0(x)

x = self.avg_pool(x)

x = x.view(x.size(0), -1)

x = self.dropout(x)

x = self.fc(x)

return x

def nasnet_large(num_classes=1):

return NASNetLarge(num_classes)

RES-AG：

class BasicBlock(nn.Module):

expansion = 1

def __init__(self, in_planes, planes, stride=1, groups=1):

super(BasicBlock, self).__init__()

self.conv1 = nn.Conv2d(

in_planes, planes, kernel_size=3, stride=stride,

padding=1, bias=False, groups=groups)

self.bn1 = nn.BatchNorm2d(planes)

self.relu = nn.ReLU(inplace=True)

self.conv2 = nn.Conv2d(

planes, planes * self.expansion, kernel_size=3, stride=1,

padding=1, bias=False, groups=groups)

self.bn2 = nn.BatchNorm2d(planes * self.expansion)

self.downsample = None

if stride != 1 or in_planes != planes * self.expansion:

self.downsample = nn.Sequential(

nn.Conv2d(

in_planes, planes * self.expansion,

kernel_size=1, stride=stride, bias=False),

nn.BatchNorm2d(planes * self.expansion),

)

def forward(self, x):

identity = x

out = self.conv1(x)

out = self.bn1(out)

out = self.relu(out)

out = self.conv2(out)

out = self.bn2(out)

if self.downsample is not None:

identity = self.downsample(x)

out += identity

out = self.relu(out)

return out

class ResNet(nn.Module):

def __init__(self, block, layers, num_classes=1000, groups_list=None, channels_list=None):

super(ResNet, self).__init__()

if groups_list is None:

groups_list = [1, 1, 1, 1]

if channels_list is None:

channels_list = [64, 128, 256, 512]

self.in_planes = channels_list[0]

self.conv1 = nn.Conv2d(

3, self.in_planes, kernel_size=7, stride=2, padding=3,

bias=False, groups=groups_list[0])

self.bn1 = nn.BatchNorm2d(self.in_planes)

self.relu = nn.ReLU(inplace=True)

self.maxpool = nn.MaxPool2d(kernel_size=3, stride=2, padding=1)

self.layer1 = self._make_layer(

block, channels_list[0], layers[0], stride=1, groups=groups_list[0])

self.layer2 = self._make_layer(

block, channels_list[1], layers[1], stride=2, groups=groups_list[1])

self.layer3 = self._make_layer(

block, channels_list[2], layers[2], stride=2, groups=groups_list[2])

self.layer4 = self._make_layer(

block, channels_list[3], layers[3], stride=2, groups=groups_list[3])

self.avgpool = nn.AdaptiveAvgPool2d((1, 1))

self.fc = nn.Linear(channels_list[3] * block.expansion, num_classes)

def _make_layer(self, block, planes, blocks, stride=1, groups=1):

layers = []

layers.append(block(self.in_planes, planes, stride, groups))

self.in_planes = planes * block.expansion

for _ in range(1, blocks):

layers.append(block(self.in_planes, planes, groups=groups))

self.in_planes = planes * block.expansion

return nn.Sequential(*layers)

def forward(self, x):

x = self.conv1(x)

x = self.bn1(x)

x = self.relu(x)

x = self.maxpool(x)

x = self.layer1(x)

x = self.layer2(x)

x = self.layer3(x)

x = self.layer4(x)

x = self.avgpool(x)

x = torch.flatten(x, 1)

x = self.fc(x)

return x

layers_options = [

[2, 2, 2, 2],

[1, 2, 3, 4],

]

channels_options = [

[64, 128, 256, 512],

[32, 64, 128, 256],

]

groups_options = [

[1, 1, 1, 1],

[2, 2, 2, 2],

[4, 4, 4, 4],

]

model = RESAGNet( BasicBlock, layers, num_classes=1,groups_list=groups_list, channels_list=channels_list) device = torch.device("cuda" if torch.cuda.is_available() else "cpu") model.to(device)
